# Supplementary material for: Molecular Detection of Trypanosoma spp. in Questing and Feeding Ticks (Ixodidae) Collected from an Endemic Region of South-West Australia
Source: MDPI journal article supplement (doi:10.3390/pathogens10081037), 2021-08-16
Supplement: s1 [file s1]

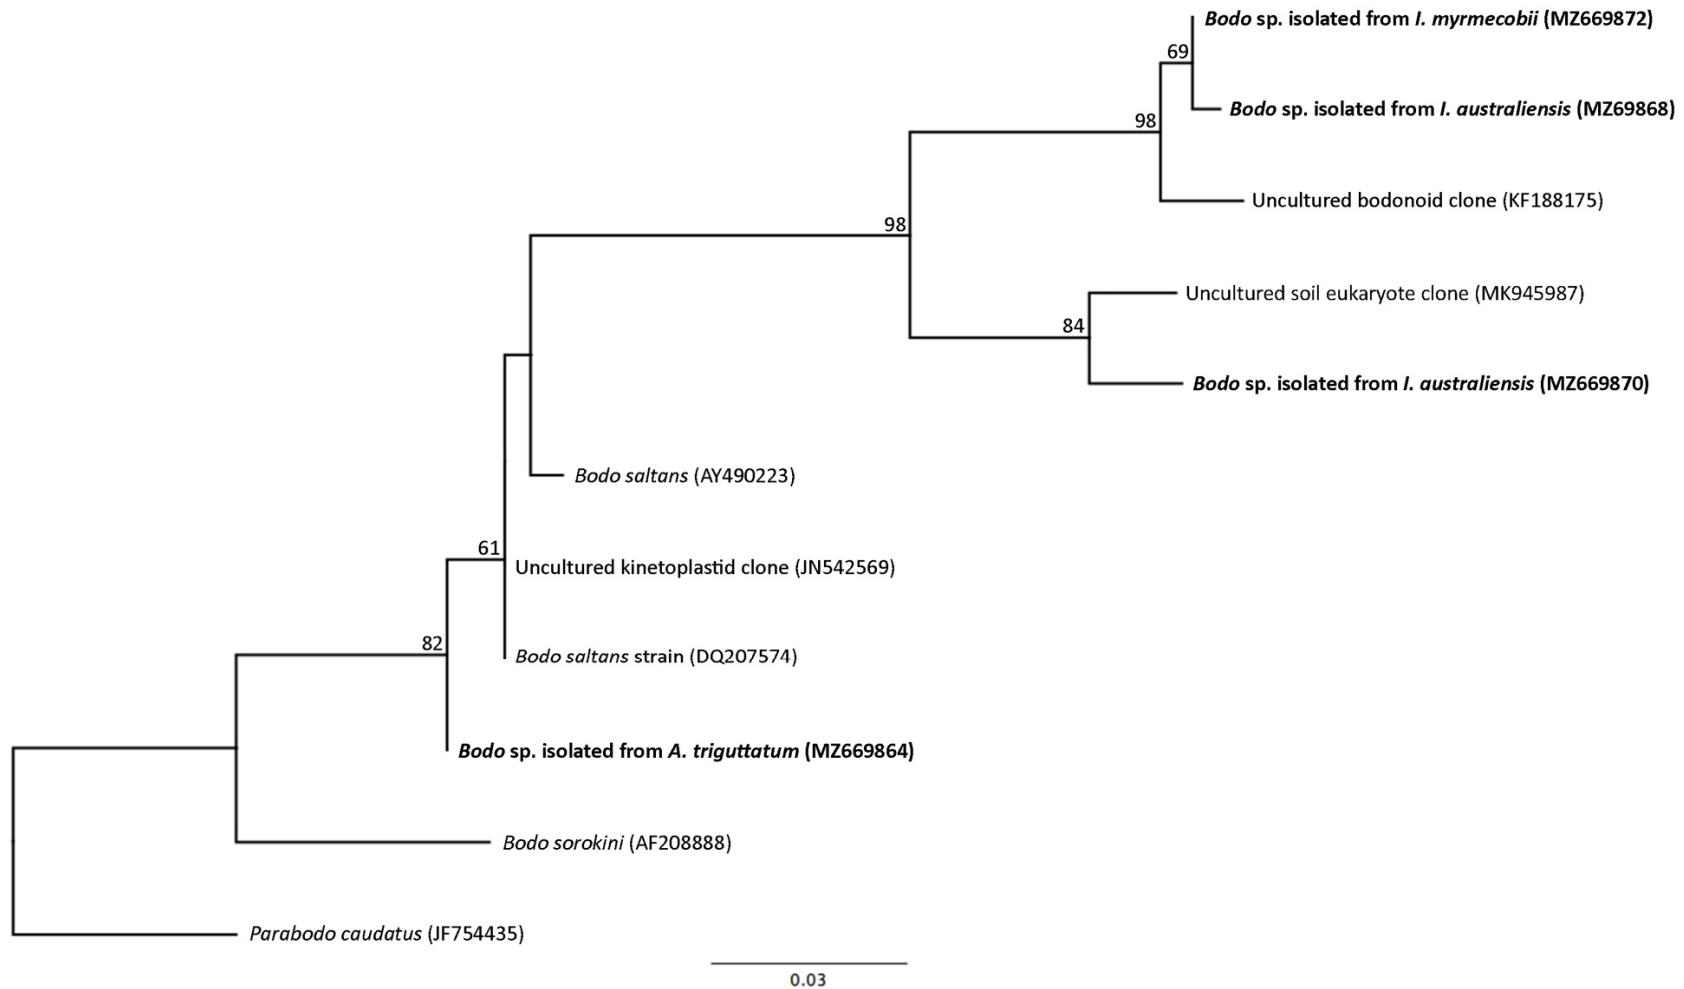

**Supplementary Figure S1.** Representative ML phylogenetic tree constructed from *Bodo* 18S rRNA partial sequences (**243 bp**). Numbers represent bootstrap support generated from 1000 replications. Values above 60% are indicated. GenBank accession numbers in brackets. Sequences from this study are in bold type.

**Supplementary Table S1.** *Trypanosoma* and *Bodo* sequences generated in [22] and the present study.

| Sample ID | <i>Trypanosoma</i> sp. | Tick species          | Tick life stage | Status   | Accession number |
|-----------|------------------------|-----------------------|-----------------|----------|------------------|
| 2018QT9   | <i>T. copemani</i>     | <i>I. myrmecobii</i>  | Female          | Questing | MW881302         |
| 2018QT12  | <i>T. copemani</i>     | <i>A. triguttatum</i> | Nymph           | Questing | MW881303         |
| 2018QT33  | <i>T. copemani</i>     | <i>A. triguttatum</i> | Nymph           | Questing | MW881304         |
| 2018QT34  | <i>T. copemani</i>     | <i>A. triguttatum</i> | Nymph           | Questing | MW881305         |
| 2018QT35  | <i>T. copemani</i>     | <i>A. triguttatum</i> | Nymph           | Questing | MW881306         |
| 2018QT45  | <i>T. copemani</i>     | <i>A. triguttatum</i> | Female          | Questing | MW881307         |
| 2018QT57  | <i>T. copemani</i>     | <i>A. triguttatum</i> | Nymph           | Questing | MW881308         |
| 2018QT65  | <i>T. copemani</i>     | <i>A. triguttatum</i> | Nymph           | Questing | MW881309         |
| 2018QT79  | <i>T. copemani</i>     | <i>A. triguttatum</i> | Nymph           | Questing | MW881310         |
| 2018QT75  | <i>T. copemani</i>     | <i>A. triguttatum</i> | Male            | Questing | MW881311         |
| 2018QT78  | <i>T. copemani</i>     | <i>A. triguttatum</i> | Female          | Questing | MW881312         |
| 2018QT78  | <i>T. copemani</i>     | <i>A. triguttatum</i> | Female          | Questing | MW881313         |
| 2018QT86  | <i>T. copemani</i>     | <i>A. triguttatum</i> | Male            | Questing | MW881314         |

|           |                                 |                         |        |          |          |
|-----------|---------------------------------|-------------------------|--------|----------|----------|
| 2018QT109 | <i>T. copemani</i>              | <i>A. triguttatum</i>   | Nymph  | Questing | MW881315 |
| 2018FT26  | <i>T. copemani</i>              | <i>I. australiensis</i> | Female | Feeding  | MW881316 |
| 2018FT31b | <i>T. copemani</i>              | <i>I. australiensis</i> | Nymph  | Feeding  | MW881317 |
| 2018FTJ5  | <i>T. copemani</i>              | <i>I. tasmani</i>       | Nymph  | Feeding  | MW881318 |
| 2018FTJ9  | <i>T. copemani</i>              | <i>I. myrmecobii</i>    | Nymph  | Feeding  | MW881319 |
| 2018FTJ11 | <i>T. copemani</i>              | <i>I. woyliei</i>       | Female | Feeding  | MW881320 |
| 2018FT31  | <i>T. copemani</i>              | <i>I. tasmani</i>       | Nymph  | Feeding  | MW881321 |
| 2018QT26  | <i>T. noyesi</i>                | <i>A. triguttatum</i>   | Nymph  | Questing | MW079253 |
| 2018QT34  | <i>T. noyesi</i>                | <i>A. triguttatum</i>   | Nymph  | Questing | MW079254 |
| 2018QT50  | <i>T. noyesi</i>                | <i>A. triguttatum</i>   | Nymph  | Questing | MW079255 |
| 2018QT51  | <i>T. noyesi</i>                | <i>A. triguttatum</i>   | Nymph  | Questing | MW079256 |
| 2018QT66  | <i>T. noyesi</i>                | <i>A. triguttatum</i>   | Nymph  | Questing | MW079257 |
| 2018QT69  | <i>T. noyesi</i>                | <i>A. triguttatum</i>   | Nymph  | Questing | MW079258 |
| 2018FT4   | <i>T. noyesi</i>                | <i>A. triguttatum</i>   | Nymph  | Feeding  | MW881322 |
| 2018QT13  | <i>T. vegrandis/T. gilletti</i> | <i>I. australiensis</i> | Male   | Questing | MW881323 |

|           |                                 |                         |        |          |          |
|-----------|---------------------------------|-------------------------|--------|----------|----------|
| 2018QT32  | <i>T. vegrandis/T. gilletti</i> | <i>A. triguttatum</i>   | Nymph  | Questing | MW881324 |
| 2018QT62  | <i>T. vegrandis/T. gilletti</i> | <i>A. triguttatum</i>   | Male   | Questing | MW881325 |
| 2018QT63  | <i>T. vegrandis/T. gilletti</i> | <i>A. triguttatum</i>   | Female | Questing | MW881326 |
| 2018QT77  | <i>T. vegrandis/T. gilletti</i> | <i>A. triguttatum</i>   | Nymph  | Questing | MW881327 |
| 2018QT84  | <i>T. vegrandis/T. gilletti</i> | <i>A. triguttatum</i>   | Nymph  | Questing | MW881328 |
| 2018QT91  | <i>T. vegrandis/T. gilletti</i> | <i>A. triguttatum</i>   | Nymph  | Questing | MW881329 |
| 2018QT100 | <i>T. vegrandis/T. gilletti</i> | <i>A. triguttatum</i>   | Nymph  | Questing | MW881330 |
| 2018QT104 | <i>T. vegrandis/T. gilletti</i> | <i>A. triguttatum</i>   | Nymph  | Questing | MW881331 |
| 2018QT111 | <i>T. vegrandis/T. gilletti</i> | <i>I. australiensis</i> | Female | Questing | MW881332 |
| 2018QT118 | <i>T. vegrandis/T. gilletti</i> | <i>A. triguttatum</i>   | Nymph  | Questing | MW881333 |
| 2018QT122 | <i>T. vegrandis/T. gilletti</i> | <i>I. australiensis</i> | Nymph  | Questing | MW881334 |
| 2018FT6a  | <i>T. vegrandis/T. gilletti</i> | <i>Amblyomma</i> spp.   | Larva  | Feeding  | MW881335 |
| 2018FT7b  | <i>T. vegrandis/T. gilletti</i> | <i>Amblyomma</i> spp.   | Larva  | Feeding  | MW881336 |
| 2018FT30a | <i>T. vegrandis/T. gilletti</i> | <i>I. tasmani</i>       | Nymph  | Feeding  | MW881337 |
| 2018FT31a | <i>T. vegrandis/T. gilletti</i> | <i>I. australiensis</i> | Nymph  | Feeding  | MW881338 |

|           |                                 |                         |        |          |          |
|-----------|---------------------------------|-------------------------|--------|----------|----------|
| 2018FT55  | <i>T. vegrandis/T. gilletti</i> | <i>I. myrmecobii</i>    | Female | Feeding  | MW881339 |
| 2018FTJ7  | <i>T. vegrandis/T. gilletti</i> | <i>I. tasmani</i>       | Nymph  | Feeding  | MW881340 |
| 2018FTJ14 | <i>T. vegrandis/T. gilletti</i> | <i>I. woyliei</i>       | Female | Feeding  | MW881341 |
| 2018FTJ19 | <i>T. vegrandis/T. gilletti</i> | <i>I. myrmecobii</i>    | Female | Feeding  | MW881342 |
| 2018FTJ21 | <i>T. vegrandis/T. gilletti</i> | <i>I. tasmani</i>       | Nymph  | Feeding  | MW881343 |
| 2018FTJ26 | <i>T. vegrandis/T. gilletti</i> | <i>I. australiensis</i> | Nymph  | Feeding  | MW881344 |
| 2018FTJ28 | <i>T. vegrandis/T. gilletti</i> | <i>Amblyomma</i> spp.   | Larva  | Feeding  | MW881345 |
| 2018QT20  | <i>Trypanosoma</i> sp. ANU2     | <i>A. triguttatum</i>   | Nymph  | Questing | MW881346 |
| 2018FTJ20 | <i>Trypanosoma</i> sp. ANU2     | <i>I. myrmecobii</i>    | Female | Feeding  | MW881347 |
| 2018FTJ25 | <i>Trypanosoma</i> sp. ANU2     | <i>I. myrmecobii</i>    | Female | Feeding  | MW881348 |
| 2018FTJ29 | <i>Trypanosoma</i> sp. ANU2     | <i>Ixodes</i> spp.      | Larva  | Feeding  | MW881349 |
| 2018QT3   | <i>Bodo</i> sp.                 | <i>A. triguttatum</i>   | Nymph  | Questing | MZ669864 |
| 2018QT25  | <i>Bodo</i> sp.                 | <i>A. triguttatum</i>   | Nymph  | Questing | MZ669865 |
| 2018QT28  | <i>Bodo</i> sp.                 | <i>A. triguttatum</i>   | Nymph  | Questing | MZ669866 |
| 2018QT37  | <i>Bodo</i> sp.                 | <i>I. myrmecobii</i>    | Female | Questing | MZ669867 |

|           |                 |                         |        |          |          |
|-----------|-----------------|-------------------------|--------|----------|----------|
| 2018QT39  | <i>Bodo</i> sp. | <i>I. australiensis</i> | Male   | Questing | MZ669868 |
| 2018QT44  | <i>Bodo</i> sp. | <i>A. triguttatum</i>   | Nymph  | Questing | MZ669869 |
| 2018QT64  | <i>Bodo</i> sp. | <i>I. australiensis</i> | Nymph  | Questing | MZ669870 |
| 2018QT72  | <i>Bodo</i> sp. | <i>A. triguttatum</i>   | Male   | Questing | MZ669871 |
| 2018QT90  | <i>Bodo</i> sp. | <i>I. myrmecobii</i>    | Female | Questing | MZ669872 |
| 2018QT93  | <i>Bodo</i> sp. | <i>I. australiensis</i> | Male   | Questing | MZ669873 |
| 2018QT96  | <i>Bodo</i> sp. | <i>A. triguttatum</i>   | Nymph  | Questing | MZ669874 |
| 2018QT97  | <i>Bodo</i> sp. | <i>A. triguttatum</i>   | female | Questing | MZ669875 |
| 2018QT101 | <i>Bodo</i> sp. | <i>A. triguttatum</i>   | Nymph  | Questing | MZ669876 |
| 2018QT106 | <i>Bodo</i> sp. | <i>A. triguttatum</i>   | Nymph  | Questing | MZ669877 |
| 2018QT107 | <i>Bodo</i> sp. | <i>I. australiensis</i> | Male   | Questing | MZ669878 |
| 2018QT113 | <i>Bodo</i> sp. | <i>A. triguttatum</i>   | Nymph  | Questing | MZ669879 |
| 2018QTW1  | <i>Bodo</i> sp. | <i>A. triguttatum</i>   | Nymph  | Questing | MZ669880 |
| 2018QTJ12 | <i>Bodo</i> sp. | <i>A. triguttatum</i>   | Nymph  | Questing | MZ669881 |
| 2018QTJ17 | <i>Bodo</i> sp. | <i>A. triguttatum</i>   | Nymph  | Questing | MZ669882 |
